# Supplementary material for: HER2-positive breast cancer that resists therapeutic drugs and ionizing radiation releases sphingomyelin-based molecules to circulating blood serum
Source: PubMed Central journal article supplement — Mol Clin Oncol. 2020 Sep 21;13(6):70. doi: 10.3892/mco.2020.2140 (PMC7523270; doi:10.3892/mco.2020.2140), 2020-09-21
Supplement: Supplementary_Data.pdf [file Supplementary_Data.pdf]

Table SI. Metabolite multiple reaction monitoring transition.

| Number | ID             | Q1 Mass<br>(m/z) | Q3 Mass<br>(m/z) | DP<br>(V) | CE<br>(V) |
|--------|----------------|------------------|------------------|-----------|-----------|
| 1      | lysoPC a C9:0  | 398.2            | 184              | 76        | 30        |
| 2      | lysoPC a C14:0 | 468.3            | 184              | 79        | 30        |
| 3      | lysoPC a C16:1 | 494.3            | 184              | 79        | 30        |
| 4      | lysoPC a C16:0 | 496.3            | 184              | 81        | 31        |
| 5      | lysoPC a C17:0 | 510.3            | 184              | 82        | 31        |
| 6      | lysoPC a C18:2 | 520.3            | 184              | 82        | 31        |
| 7      | lysoPC a C18:1 | 522.3            | 184              | 82        | 31        |
| 8      | lysoPC a C18:0 | 524.3            | 184              | 85        | 31        |
| 9      | lysoPC a C20:4 | 544.3            | 184              | 85        | 31        |
| 10     | lysoPC a C20:3 | 546.3            | 184              | 87        | 31        |
| 11     | SM C6:0        | 563.4            | 184              | 94        | 32        |
| 12     | lysoPC a C24:0 | 608.4            | 184              | 96        | 33        |
| 13     | PC aa C24:0    | 622.4            | 184              | 98        | 33        |
| 14     | lysoPC a C26:1 | 634.4            | 184              | 98        | 33        |
| 15     | lysoPC a C26:0 | 636.5            | 184              | 101       | 34        |
| 16     | PC aa C26:0    | 650.5            | 184              | 103       | 35        |
| 17     | lysoPC a C28:1 | 662.5            | 184              | 103       | 35        |
| 18     | lysoPC a C28:0 | 664.5            | 184              | 105       | 35        |
| 19     | PC aa C28:1    | 676.5            | 184              | 106       | 35        |
| 20     | PC aa C28:0    | 678.5            | 184              | 108       | 36        |
| 21     | PC ae C30:2    | 688.5            | 184              | 108       | 36        |
| 22     | SM (OH) C14:1  | 689.6            | 184              | 108       | 36        |
| 23     | PC ae C30:1    | 690.5            | 184              | 109       | 36        |
| 24     | PC ae C30:0    | 692.6            | 184              | 111       | 37        |
| 25     | SM C16:1       | 701.6            | 184              | 111       | 37        |
| 26     | PC aa C30:2    | 702.5            | 184              | 111       | 37        |
| 27     | SM C16:0       | 703.6            | 184              | 112       | 37        |
| 28     | PC aa C30:0    | 706.5            | 184              | 114       | 37        |
| 29     | PC ae C32:2    | 716.6            | 184              | 114       | 37        |
| 30     | SM (OH) C16:1  | 717.6            | 184              | 114       | 38        |
| 31     | PC ae C32:1    | 718.6            | 184              | 115       | 38        |
| 32     | PC aa C32:3    | 728.5            | 184              | 117       | 38        |
| 33     | SM C18:1       | 729.6            | 184              | 117       | 38        |
| 34     | PC aa C32:2    | 730.5            | 184              | 117       | 38        |
| 35     | SM C18:0       | 731.6            | 184              | 117       | 38        |
| 36     | PC aa C32:1    | 732.6            | 184              | 118       | 39        |
| 37     | PC aa C32:0    | 734.6            | 184              | 119       | 39        |
| 38     | PC ae C34:3    | 742.6            | 184              | 120       | 39        |
| 39     | PC ae C34:2    | 744.6            | 184              | 120       | 39        |
| 40     | PC ae C34:1    | 746.6            | 184              | 121       | 39        |
| 41     | PC ae C34:0    | 748.6            | 184              | 122       | 40        |
| 42     | PC aa C34:4    | 754.5            | 184              | 122       | 40        |
| 43     | SM C20:2       | 755.6            | 184              | 123       | 40        |
| 44     | PC aa C34:3    | 756.6            | 184              | 123       | 40        |
| 45     | PC aa C34:2    | 758.6            | 184              | 123       | 40        |
| 46     | PC aa C34:1    | 760.6            | 184              | 125       | 41        |
| 47     | PC ae C36:5    | 766.6            | 184              | 125       | 41        |
| 48     | PC ae C36:4    | 768.6            | 184              | 126       | 41        |
| 49     | PC ae C36:3    | 770.6            | 184              | 126       | 41        |
| 50     | PC ae C36:2    | 772.6            | 184              | 127       | 41        |
| 51     | PC ae C36:1    | 774.6            | 184              | 127       | 41        |
| 52     | PC ae C36:0    | 776.7            | 184              | 128       | 42        |
| 53     | PC aa C36:6    | 778.5            | 184              | 128       | 42        |
| 54     | PC aa C36:5    | 780.6            | 184              | 128       | 42        |
| 55     | SM C22:3       | 781.6            | 184              | 129       | 42        |
| 56     | PC aa C36:4    | 782.6            | 184              | 129       | 42        |
| 57     | PC aa C36:3    | 784.6            | 184              | 130       | 42        |
| 58     | PC aa C36:2    | 786.6            | 184              | 130       | 42        |

Table SI. Continued.

| Number | ID            | Q1 Mass<br>(m/z) | Q3 Mass<br>(m/z) | DP<br>(V) | CE<br>(V) |
|--------|---------------|------------------|------------------|-----------|-----------|
| 59     | PC aa C36:1   | 788.6            | 184              | 131       | 43        |
| 60     | PC aa C36:0   | 790.6            | 184              | 131       | 43        |
| 61     | PC ae C38:6   | 792.6            | 184              | 132       | 43        |
| 62     | PC ae C38:5   | 794.6            | 184              | 132       | 43        |
| 63     | PC ae C38:4   | 796.6            | 184              | 133       | 43        |
| 64     | PC ae C38:3   | 798.6            | 184              | 133       | 43        |
| 65     | SM (OH) C22:2 | 799.7            | 184              | 133       | 43        |
| 66     | PC ae C38:2   | 800.7            | 184              | 133       | 43        |
| 67     | SM (OH) C22:1 | 801.7            | 184              | 134       | 43        |
| 68     | PC ae C38:1   | 802.7            | 184              | 134       | 44        |
| 69     | PC ae C38:0   | 804.7            | 184              | 135       | 44        |
| 70     | PC aa C38:6   | 806.6            | 184              | 135       | 44        |
| 71     | PC aa C38:5   | 808.6            | 184              | 136       | 44        |
| 72     | PC aa C38:4   | 810.6            | 184              | 136       | 44        |
| 73     | PC aa C38:3   | 812.6            | 184              | 136       | 44        |
| 74     | SM C24:1      | 813.7            | 184              | 137       | 45        |
| 75     | SM C24:0      | 815.7            | 184              | 137       | 45        |
| 76     | PC aa C38:1   | 816.7            | 184              | 138       | 45        |
| 77     | PC aa C38:0   | 818.7            | 184              | 138       | 45        |
| 78     | PC ae C40:6   | 820.6            | 184              | 139       | 45        |
| 79     | PC ae C40:5   | 822.6            | 184              | 139       | 45        |
| 80     | PC ae C40:4   | 824.7            | 184              | 140       | 45        |
| 81     | PC ae C40:3   | 826.7            | 184              | 140       | 46        |
| 82     | PC ae C40:2   | 828.7            | 184              | 141       | 46        |
| 83     | SM (OH) C24:1 | 829.7            | 184              | 141       | 46        |
| 84     | PC ae C40:1   | 830.7            | 184              | 141       | 46        |
| 85     | PC aa C40:6   | 834.6            | 184              | 143       | 46        |
| 86     | PC aa C40:5   | 836.6            | 184              | 143       | 47        |
| 87     | PC aa C40:4   | 838.6            | 184              | 144       | 47        |
| 88     | PC aa C40:3   | 840.7            | 184              | 144       | 47        |
| 89     | SM C26:1      | 841.7            | 184              | 144       | 47        |
| 90     | PC aa C40:2   | 842.7            | 184              | 144       | 47        |
| 91     | SM C26:0      | 843.7            | 184              | 145       | 47        |
| 92     | PC aa C40:1   | 844.7            | 184              | 145       | 47        |
| 93     | PC aa C40:0   | 846.7            | 184              | 146       | 48        |
| 94     | PC ae C42:5   | 850.7            | 184              | 147       | 48        |
| 95     | PC ae C42:4   | 852.7            | 184              | 148       | 48        |
| 96     | PC ae C42:3   | 854.7            | 184              | 148       | 48        |
| 97     | PC ae C42:2   | 856.7            | 184              | 149       | 48        |
| 98     | PC ae C42:1   | 858.7            | 184              | 141       | 46        |
| 99     | PC ae C42:0   | 860.8            | 184              | 150       | 49        |
| 100    | PC aa C42:6   | 862.6            | 184              | 150       | 49        |
| 101    | PC aa C42:5   | 864.7            | 184              | 151       | 49        |
| 102    | PC aa C42:4   | 866.7            | 184              | 152       | 50        |
| 103    | PC aa C42:2   | 870.7            | 184              | 153       | 50        |
| 104    | PC aa C42:1   | 872.7            | 184              | 153       | 50        |
| 105    | PC aa C42:0   | 874.7            | 184              | 154       | 50        |
| 106    | PC ae C44:6   | 876.7            | 184              | 154       | 50        |
| 107    | PC ae C44:5   | 878.7            | 184              | 155       | 51        |
| 108    | PC ae C44:4   | 880.7            | 184              | 156       | 51        |
| 109    | PC ae C44:3   | 882.7            | 184              | 156       | 51        |
| 110    | C0            | 162.1            | 85.1             | 61        | 27        |
| 111    | D3-C0         | 165.1            | 85.1             | 61        | 27        |
| 112    | C2            | 204.1            | 85.1             | 140       | 27        |
| 113    | D3-C2         | 207.1            | 85.1             | 140       | 27        |
| 114    | C3:1          | 216.1            | 85.1             | 140       | 27        |
| 114    | C3:1          | 216.1            | 85.1             | 140       | 27        |
| 115    | C3            | 218.1            | 85.1             | 140       | 29        |

Table SI. Continued.

| Number | ID              | Q1 Mass<br>(m/z) | Q3 Mass<br>(m/z) | DP<br>(V) | CE<br>(V) |
|--------|-----------------|------------------|------------------|-----------|-----------|
| 116    | C4:1            | 230.1            | 85.1             | 140       | 29        |
| 117    | C4              | 232.2            | 85.1             | 140       | 29        |
| 118    | D3-C4           | 235.2            | 85.1             | 140       | 29        |
| 119    | C3-OH           | 234.1            | 85.1             | 140       | 30        |
| 120    | C5:1            | 244.2            | 85.1             | 140       | 31        |
| 121    | C5              | 246.2            | 85.1             | 140       | 29        |
| 122    | D9-C5           | 255.2            | 85.1             | 140       | 29        |
| 123    | C3-DC (C4-OH)   | 248.1            | 85.1             | 140       | 32        |
| 124    | C6:1            | 258.2            | 85.1             | 140       | 33        |
| 125    | C6 (C4:1-DC)    | 260.2            | 85.1             | 140       | 27        |
| 126    | D3-C6           | 263.2            | 85.1             | 140       | 27        |
| 127    | C5-OH (C3-DC-M) | 262.2            | 85.1             | 140       | 33        |
| 128    | C5:1-DC         | 274.1            | 85.1             | 60        | 35        |
| 129    | C5-DC (C6-OH)   | 276.2            | 85.1             | 61        | 35        |
| 130    | C8              | 288.2            | 85.1             | 66        | 33        |
| 131    | D3-C8           | 291.2            | 85.1             | 66        | 33        |
| 132    | C9              | 302.2            | 85.1             | 66        | 39        |
| 133    | C7-DC           | 304.2            | 85.1             | 66        | 39        |
| 134    | C10:2           | 312.2            | 85.1             | 67        | 40        |
| 135    | C10:1           | 314.2            | 85.1             | 68        | 40        |
| 136    | C10             | 316.2            | 85.1             | 140       | 37        |
| 137    | D3-C10          | 319.3            | 85.1             | 140       | 37        |
| 138    | C12:1           | 342.3            | 85.1             | 73        | 44        |
| 139    | C12             | 344.3            | 85.1             | 73        | 44        |
| 140    | C14:2           | 368.3            | 85.1             | 78        | 47        |
| 141    | C14:1           | 370.3            | 85.1             | 78        | 47        |
| 142    | C14             | 372.3            | 85.1             | 86        | 45        |
| 143    | C12-DC          | 374.3            | 85.1             | 86        | 45        |
| 144    | C14:2-OH        | 384.3            | 85.1             | 81        | 49        |
| 145    | C14:1-OH        | 386.3            | 85.1             | 81        | 50        |
| 146    | C16:2           | 396.3            | 85.1             | 83        | 51        |
| 147    | C16:1           | 398.3            | 85.1             | 84        | 51        |
| 148    | C16             | 400.3            | 85.1             | 84        | 51        |
| 149    | D3-C16          | 403.3            | 85.1             | 84        | 51        |
| 150    | C16:2-OH        | 412.3            | 85.1             | 86        | 53        |
| 151    | C16:1-OH        | 414.3            | 85.1             | 87        | 53        |
| 152    | C16-OH          | 416.3            | 85.1             | 87        | 53        |
| 153    | C18:2           | 424.3            | 85.1             | 89        | 54        |
| 154    | C18:1           | 426.4            | 85.1             | 89        | 55        |
| 155    | C18             | 428.4            | 85.1             | 96        | 63        |
| 156    | D3-C18          | 431.4            | 85.1             | 96        | 63        |
| 157    | C18:1-OH        | 442.4            | 85.1             | 92        | 57        |
| 158    | C5-M-DC         | 290.2            | 85.1             | 63        | 37        |
| 159    | H1              | 198.17           | 180              | 140       | 9         |
| 160    | 13C6-Gluc       | 204.13           | 186.19           | 140       | 9         |
